# Supplementary material
Source: PubMed Central journal article supplement (PMC4492282)
Supplement: NIHMS607736-supplement-01.pdf [file NIHMS607736-supplement-01.pdf]

Table S1. Two-Bio-Parent Households: Multivariate Analysis of Mother- and Father-Reported Child Externalizing Behavior as a Function of Demographic Characteristics, Family History of Externalizing Disorders, and Treatment Condition.

| Parameter                                                                           | Mother Report |       |        |               |       |        | Father Report |       |        |               |       |        |
|-------------------------------------------------------------------------------------|---------------|-------|--------|---------------|-------|--------|---------------|-------|--------|---------------|-------|--------|
|                                                                                     | BASELINE      |       |        | POSTTREATMENT |       |        | BASELINE      |       |        | POSTTREATMENT |       |        |
|                                                                                     | B (SE)        | t     | p      |
| <b>Intercept</b>                                                                    | 62.41 (3.32)  | 18.81 | <.0001 | 61.09 (3.83)  | 15.95 | <.0001 | 57.07 (3.79)  | 15.05 | <.0001 | 57.30 (4.16)  | 13.77 | <.0001 |
| <b>Treatment/control (ref=control)</b>                                              |               |       |        |               |       |        |               |       |        |               |       |        |
| <b>Treatment</b>                                                                    | -1.27 (1.24)  | -1.02 | 0.31   | -5.71 (1.43)  | -3.99 | <.0001 | -1.35 (1.31)  | -1.03 | 0.31   | -5.77 (1.44)  | -4.01 | <.0001 |
| <b>Combined hx of externalizing disorders (ref=NO first- or second-degree risk)</b> |               |       |        |               |       |        |               |       |        |               |       |        |
| <b>First- AND second-degree risk</b>                                                | 5.25 (1.53)   | 3.43  | <.001  | 5.24 (1.77)   | 2.96  | <.01   | 4.02 (1.63)   | 2.47  | <.05   | 3.90 (1.78)   | 2.18  | <.05   |
| <b>First-degree risk only</b>                                                       | 2.60 (2.22)   | 1.17  | ns     | 2.06 (2.56)   | 0.81  | ns     | 2.01 (2.44)   | 0.82  | ns     | 2.14 (2.68)   | 0.80  | ns     |
| <b>Second-degree risk only</b>                                                      | 1.91 (1.36)   | 1.40  | ns     | 1.16 (1.57)   | 0.74  | ns     | -0.07 (1.43)  | -0.05 | ns     | 0.82 (1.56)   | 0.53  | ns     |
| <b>Child's sex (ref=Female)</b>                                                     |               |       |        |               |       |        |               |       |        |               |       |        |
| <b>Male</b>                                                                         | 0.82 (1.36)   | 0.60  | ns     | 0.51 (1.57)   | 0.32  | ns     | -0.97 (1.44)  | -0.67 | ns     | 2.04 (1.58)   | 1.29  | ns     |
| <b>Maternal education (ref= high school or less)</b>                                |               |       |        |               |       |        |               |       |        |               |       |        |
| <b>4-year college or more</b>                                                       | 0.19 (1.53)   | 0.13  | ns     | -0.12 (1.77)  | -0.07 | ns     | 1.21 (1.66)   | 0.73  | ns     | -1.24 (1.83)  | -0.68 | ns     |
| <b>Some College</b>                                                                 | -0.67 (1.63)  | -0.41 | ns     | -0.81 (1.88)  | -0.43 | ns     | 2.82 (1.77)   | 1.59  | ns     | -0.44 (1.95)  | -0.23 | ns     |
| <b>Maternal race (ref=non-white)</b>                                                |               |       |        |               |       |        |               |       |        |               |       |        |
| <b>White</b>                                                                        | 1.15 (2.54)   | 0.45  | ns     | -0.15 (2.93)  | -0.05 | ns     | 5.63 (2.83)   | 1.99  | <.05   | 1.81 (3.10)   | 0.58  | ns     |
| <b>Maternal/paternal depression at baseline<sup>a</sup></b>                         |               |       |        |               |       |        |               |       |        |               |       |        |
| <b>BDI</b>                                                                          | 0.18 (0.10)   | 1.78  | ns     | 0.20 (0.12)   | 1.71  | ns     | 0.28 (0.13)   | 2.18  | <.05   | 0.39 (0.14)   | 2.71  | <.01   |
| <b>Model Statistics</b>                                                             | $r^2=0.085$   |       |        | $r^2=0.122$   |       |        | $r^2=0.104$   |       |        | $r^2=0.158$   |       |        |

Note: BDI = Beck Depression Inventory; hx = history; ref = reference.

<sup>a</sup>Depression score corresponds with the reporter of child behavior in the model.

Table S2. Single-Bio-Mother Households: Multivariate Analysis of Mother-Reported Child Externalizing Behavior as a Function of Demographic Characteristics, Family History of Externalizing Disorders, and Treatment Condition

| Parameter                                                                            | Mother Report |       |                      | POSTTREATMENT |       |                      |
|--------------------------------------------------------------------------------------|---------------|-------|----------------------|---------------|-------|----------------------|
|                                                                                      | B (SE)        | t     | p                    | B (SE)        | t     | p                    |
| <b>Intercept</b>                                                                     | 66.92 (4.90)  | 13.65 | <.0001               | 67.43 (5.49)  | 12.29 | <.0001               |
| <b>Treatment/control (ref=control)</b>                                               |               |       |                      |               |       |                      |
| <b>Treatment</b>                                                                     | -2.35 (2.24)  | -1.05 | ns                   | -7.94 (2.50)  | -3.17 | <.01                 |
| <b>Combined hx of externalizing disorders (ref= NO first- or second-degree risk)</b> |               |       |                      |               |       |                      |
| <b>First- AND second-degree risk</b>                                                 | 3.47 (2.30)   | 1.51  | ns                   | 0.64 (2.58)   | 0.25  | ns                   |
| <b>First-degree risk only</b>                                                        | 4.39 (3.57)   | 1.23  | ns                   | 0.38 (3.99)   | 0.09  | ns                   |
| <b>Second-degree risk only</b>                                                       | 2.44 (2.45)   | 1.00  | ns                   | 3.77 (2.74)   | 1.37  | ns                   |
| <b>Child's sex (ref=Female)</b>                                                      |               |       |                      |               |       |                      |
| <b>Male</b>                                                                          | 1.19 (2.16)   | 0.55  | ns                   | -2.54 (2.42)  | -1.05 | ns                   |
| <b>Maternal education (ref= high school or less)</b>                                 |               |       |                      |               |       |                      |
| <b>4-year college or more</b>                                                        | -4.09 (2.58)  | -1.58 | ns                   | -3.93 (2.89)  | -1.36 | ns                   |
| <b>Some College</b>                                                                  | -0.57 (2.32)  | -0.25 | ns                   | -3.04 (2.60)  | -1.17 | ns                   |
| <b>Maternal race (ref=non-white)</b>                                                 |               |       |                      |               |       |                      |
| <b>White</b>                                                                         | 2.91 (3.20)   | 0.91  | ns                   | 4.35 (3.58)   | 1.22  | ns                   |
| <b>Caregiver depression at baseline</b>                                              |               |       |                      |               |       |                      |
| <b>BDI</b>                                                                           | 0.08 (0.12)   | 0.69  | ns                   | 0.03 (0.13)   | 0.24  | ns                   |
| <b>Model Statistics</b>                                                              |               |       | r <sup>2</sup> =.155 |               |       | r <sup>2</sup> =.227 |

Note: BDI = Beck's Depression Inventory; hx = history; ref = reference.
